# Supplementary material for: Energy level modulation of MoS2monolayers by halide doping for an enhanced hydrogen evolution reaction
Source: Royal Society of Chemistry journal article supplement (doi:10.1039/d2ta06105h), 2022-01-01
Supplement: d2ta06105h1.pdf [file d2ta06105h1.pdf]

## Supporting Information

### Energy Level Modulation of MoS<sub>2</sub> Monolayers by Halide Doping for Enhanced Hydrogen Evolution Reaction

Jungmoon Lim <sup>a,1</sup>, Taehun Kim <sup>a</sup>, Junsung Byeon <sup>a</sup>, Kyung-Ho Park <sup>b</sup>, John Hong <sup>c</sup>, Sangyeon Pak <sup>d,\*</sup> and SeungNam Cha <sup>a,\*</sup>

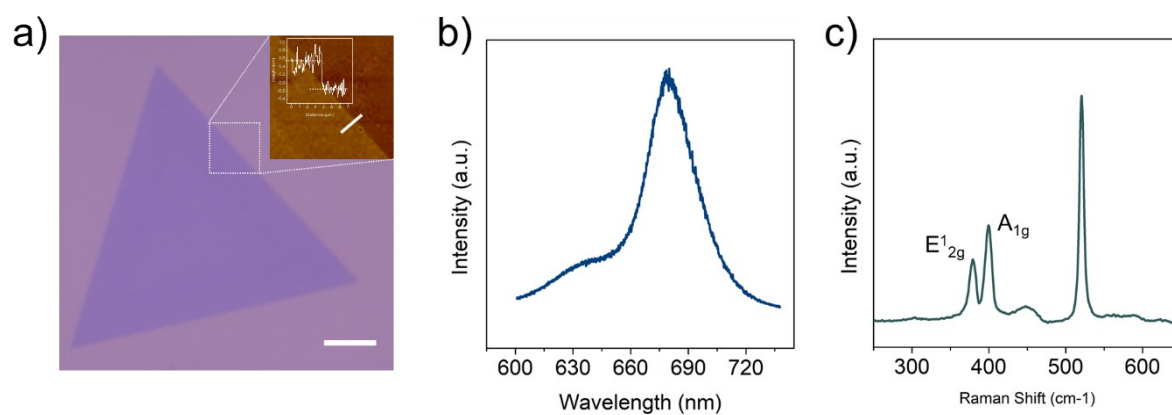

**Figure S1.** (a) Optical microscope image of CVD grown MoS<sub>2</sub>. Inset, atomic force microscope mapping image and height profile. (b) Photoluminescence (PL) spectra and (c) Raman spectra of MoS<sub>2</sub> crystals. Scale bar: 20 $\mu$ m

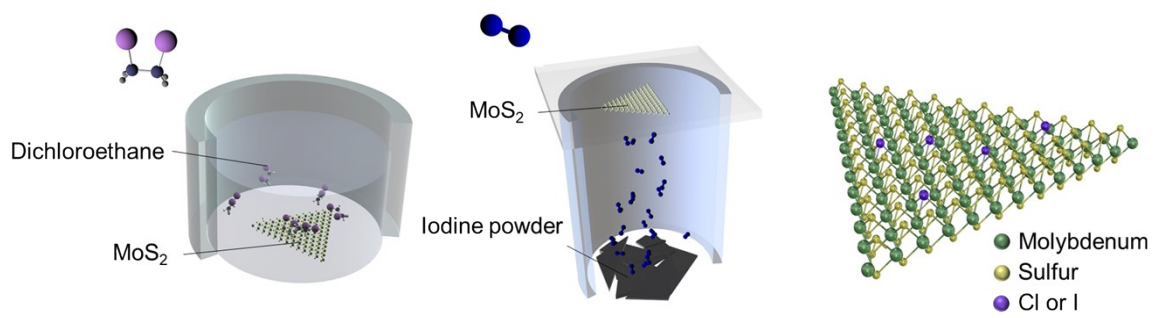

**Figure S2.** Schematics illustration of halide doping technique. Dichloroethane solution was used for chlorine doping and iodine powder were used for iodine doping, respectively.

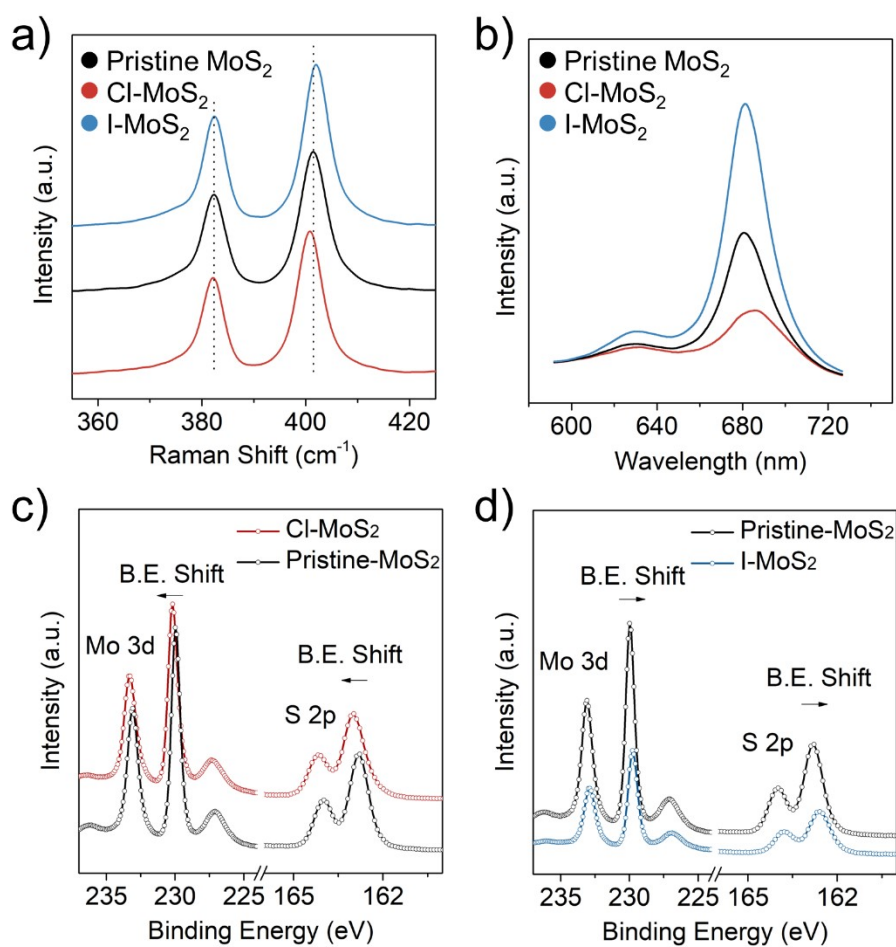

**Figure S3.** Raman, photoluminescence (PL) and X-ray photoelectron spectroscopy (XPS) measurements of MoS<sub>2</sub> monolayer halide doped with Cl and I. (a) Raman and (b) PL spectra of Cl and I-MoS<sub>2</sub> compared with pristine MoS<sub>2</sub> monolayers. (c) XPS spectra of Cl-MoS<sub>2</sub> and (e) I-MoS<sub>2</sub> compared with pristine MoS<sub>2</sub>.

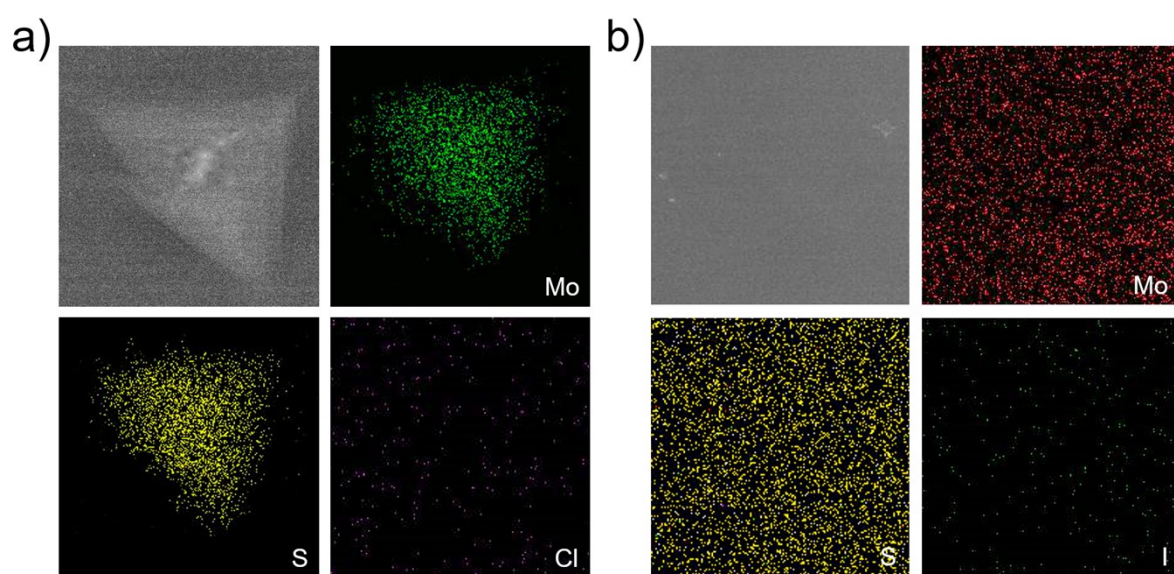

**Figure S4.** EDS mapping image of halide doped MoS<sub>2</sub>. (a) Cl-MoS<sub>2</sub> and (b) I-MoS<sub>2</sub> EDS mapping images.

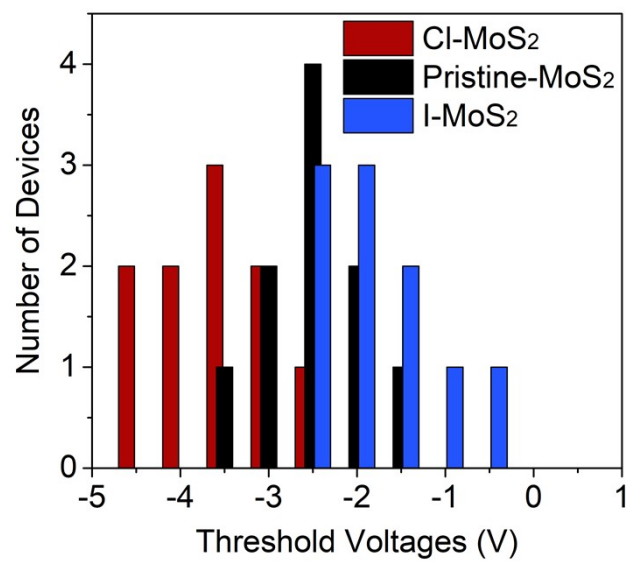

**Figure S5.** Statistical chart showing the threshold voltage of MoS<sub>2</sub> transistor before and after halide doping.

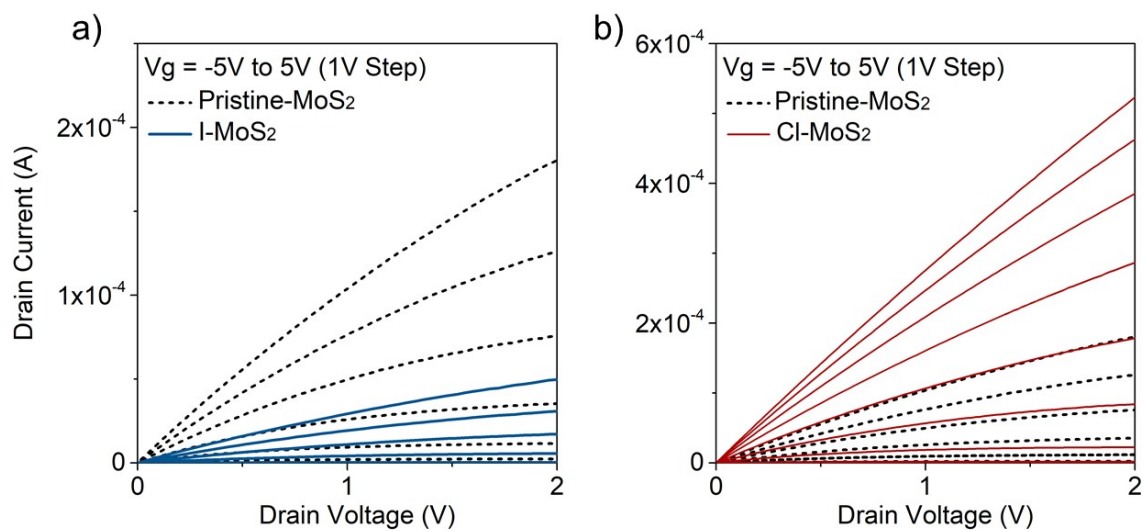

**Figure S6.** Output curves at difference gate bias ( $V_g$ ) acquired from Cl-MoS<sub>2</sub> and I-MoS<sub>2</sub> FET devices.

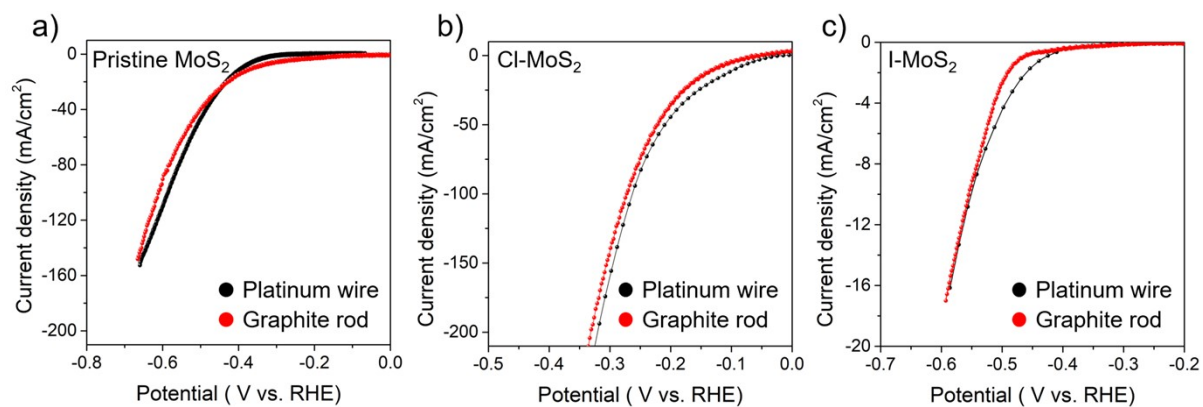

**Figure S7.** Electrochemical hydrogen evolution performance measurements with graphite rod counter electrode. The polarization curve of (a) pristine, (b) Cl-MoS<sub>2</sub>, and (c) I-MoS<sub>2</sub> catalysts.



### Carrier density dependent current flow at the interface.

To illustrate the increased current with doping, we use the quantum tunneling model and diffusion model to describe the charge transfer characteristics between semiconductor and electrolyte with doping. The classical drift current is described by the equation

$$J_n = \left( \frac{q^2 D_n N_c}{k_B T} \right) \sqrt{\frac{2q(V_D - V_a)N_D}{\epsilon_0 \epsilon_s}} \exp\left(-\frac{q\phi_{Bn}}{k_B T}\right) \left[ \exp\left(\frac{qV_a}{k_B T}\right) - 1 \right], \quad (1)$$

$$V_D = \phi_{Bn} + \frac{k_B T}{q} \ln\left(\frac{N_D}{N_c}\right)$$

where  $V_D$  is built-in potential  $D_n = (k_B T/q)\mu_n$  is the electron diffusion coefficient,  $k_B$  is

Boltzmann constant,  $T$  is absolute temperature,  $N_c = 2\left(\frac{2\pi m_n k_B T}{h^2}\right)^{\frac{3}{2}}$  is effective density of

state,  $N_D$  is dopant density,  $V_a$  is applied bias and  $\phi_{Bn}$  is barrier height of junction. From equation (E1), it is seen that built-in potential will increase with nature logarithm of dopant density and also drift current density  $J_n$  will increase with square root of dopant density and built-in potential. Finally, when semiconductor is doped with n-type doping, drift current will increase. In semiconductor-electrolyte junction, depletion width will decrease with increasing dopant density. The tunneling current density is given by

$$J_t \approx \left( -q\phi_{Bn}/E_{00} \right) \quad (2)$$

where  $E_{00} = (q\hbar/2)\sqrt{N_D/m^* \epsilon_0 \epsilon_s}$  is tunneling transmission coefficient and  $m^*$  is effective mass of electron. From equation (2), it is verified that the tunneling current density will increase exponentially with square root of dopant density and decrease exponentially with increasing barrier height. Then we can find that when semiconductor is doped with n-type doping, tunneling current will also increase. Charge transport between the junction also can be described by the thermionic emission model. Thermionic emission current is given by

$$J_0 = A^* T^2 \exp\left(-\frac{q\phi_{Bn}}{k_B T}\right) \left[ \exp\left(\frac{qV_a}{k_B T} - 1\right) \right] \quad (3)$$

where  $A^* = 4\pi m_n^* q k_B^2 / h^3$  is effective Richardson constant. But, in equation (3), there is no dependence of dopant density. Therefore, we can confirm that current density between the semiconductor and electrolyte will increase with equation (1) and (2).<sup>1-3</sup>

## Reference

1. V. Balzani and I. Wiley, *Electron transfer in chemistry*, Wiley-VCH, Weinheim ; New York, 2001.
2. S. S. Li, S. S. Li and SpringerLink, *Semiconductor Physical Electronics*, Springer New York, New York, NY, 2006.
3. K. D. Karlin and I. Wiley, *Progress in inorganic chemistry*, Wiley

John Wiley distributor, Hoboken, N.J

Chichester, 2007.
